1        Molnupiravir clinical trial simulation suggests that polymerase chain  
2        reaction underestimates antiviral potency against SARS-CoV-2

3  
4  
5        **Authors**

6        Shadisadat Esmaeili,<sup>1\*</sup> Katherine Owens,<sup>1</sup> Jessica Wagoner,<sup>2</sup> Stephen J. Polyak,<sup>2</sup> Shengyuan  
7        Zhang<sup>3</sup>, Joseph F. Standing<sup>3,4</sup>, David M. Lowe<sup>5,6</sup>, Joshua T. Schiffer<sup>1,7</sup>

8  
9        **Affiliations**

10        <sup>1</sup> Vaccine and Infectious Disease Division, Fred Hutchinson Cancer Center; Seattle, WA, USA.

11        <sup>2</sup> Department of Laboratory Medicine & Pathology, University of Washington; Seattle, WA, USA.

12        <sup>3</sup> Infection, Immunity and Inflammation, Great Ormond Street Institute of Child Health, University  
13        College London, London, UK

14        <sup>4</sup> Great Ormond Street Hospital for Children NHS Trust, London, UK

15        <sup>5</sup> Department of Clinical Immunology, Royal Free London NHS Foundation Trust, London, UK.

16        <sup>6</sup> Institute of Immunity and Transplantation, University College London, London, UK

17        <sup>7</sup> Department of Medicine, University of Washington; Seattle, WA, USA.

18

19        \*Corresponding Author: [sesmaeil@fredhutch.org](mailto:sesmaeil@fredhutch.org)

20

21

22 **Abstract**

23

24 Molnupiravir is an antiviral medicine that induces lethal copying errors into SARS-CoV-2 RNA.  
25 Molnupiravir reduced hospitalization in one pivotal trial by 50% and had variable effects on  
26 reducing viral RNA levels in three separate trials. We used mathematical models to simulate  
27 these trials and closely recapitulated their virologic outcomes. Model simulations suggest lower  
28 antiviral potency against pre-omicron SARS-CoV-2 variants than against omicron. We estimate  
29 that in vitro assays underestimate in vivo potency 7-8 fold against omicron variants. Our model  
30 suggests that because polymerase chain reaction detects molnupiravir mutated variants, the true  
31 reduction in genetically intact viral RNA is underestimated by ~0.5 log in the two trials, which  
32 included participants with omicron. Our results reinforce past work suggesting that in vitro  
33 assays are unreliable for estimating in vivo antiviral drug potency and suggest that virologic  
34 endpoints for respiratory virus clinical trials should be catered to the drug mechanism of action.

35

36

37

38

39

40

41

## 42 Introduction

43  
44 Molnupiravir is an antiviral drug that induces errors in the SARS-CoV-2 genome, which  
45 typically renders the virus unable to replicate further.<sup>1</sup> In the randomized double-blinded MOVE-  
46 OUT trial, which enrolled unvaccinated individuals when delta, mu, and gamma variants of  
47 concern (VOC) were circulating, molnupiravir reduced hospitalization by 50% and viral load  
48 after treatment by 0.3 log relative to placebo.<sup>2</sup> In the platform adaptive PANORAMIC trial,  
49 which enrolled vaccinated individuals when omicron VOCs were circulating, molnupiravir did  
50 not lower hospitalization rates, which were only 1% in both arms, but lowered viral load after  
51 treatment by 0.94 log relative to usual care.<sup>3</sup> In the platform adaptive PLATCOV trial, which  
52 enrolled low-risk individuals when omicron VOCs were circulating, molnupiravir lowered viral  
53 load after treatment by 1.09 log relative to usual care.<sup>4</sup> Taken together, these trials demonstrate  
54 that molnupiravir has both clinical and virologic efficacy which varied across trials and viral  
55 variants.

56  
57 Overall, use of molnupiravir has been lower than that of nirmatrelvir / ritonavir based on lower  
58 reduction in hospitalization in MOVE-OUT relative to the EPIC-HR trial for nirmatrelvir /  
59 ritonavir.<sup>5</sup> A concern has also been raised that molnupiravir's mechanism of action could  
60 generate novel mutants that persist after cessation of treatment,<sup>6</sup> and then spread in the  
61 population.<sup>7</sup> Nevertheless, PANORAMIC and PLATCOV results suggest high potency, and  
62 molnupiravir is still considered in individuals in whom nirmatrelvir / ritonavir is contraindicated,  
63 and in combination with other drugs in immunocompromised hosts.<sup>8,9</sup> There is currently no  
64 explanation for the disparate antiviral effects in MOVE-OUT versus PANORAMIC and  
65 PLATCOV. Moreover, the fact that polymerase chain reaction (PCR) detects drug-altered viral  
66 RNA molecules<sup>6</sup> has not always been considered in the analysis of trial outcomes.

67  
68 We previously used clinical trial simulation to reproduce results from nirmatrelvir / ritonavir  
69 trials for SARS-CoV-2.<sup>10,11</sup> We first validated a viral immune dynamic model (VID) against a  
70 very large prospective cohort of infections that included multiple VOCs.<sup>11</sup> We used diverse  
71 virologic output from this model to create simulated cohorts for the control arms of trials. We  
72 then layered pharmacokinetic (PK) and pharmacodynamic (PD) models for nirmatrelvir /  
73 ritonavir on the VID models to simulate treatment arms.<sup>10</sup> This approach recapitulated mean viral  
74 load reduction in the EPIC-HR and PLATCOV trials, as well as individual viral load trajectories  
75 in PLATCOV. The validated model was then used to explain the high frequency of virologic and  
76 concurrent symptomatic rebound with use in the community,<sup>12</sup> despite very low levels of  
77 virologic and symptomatic rebound in the EPIC-HR trial.<sup>13,14</sup> Model output suggests that  
78 extending therapy from 5 to 10 days would nearly eliminate rebound,<sup>10</sup> a result confirmed with  
79 modeling of separate data by another group.<sup>15</sup>

80  
81 Here we expand this approach to develop a new joint VID-PK-PD model to account for the  
82 unique mechanism of action of molnupiravir. We simulate by fitting the model to results from the  
83 MOVE-OUT, PLATCOV and PANORAMIC trials. Our results suggest that quantitative viral  
84 PCR likely underestimates the reduction in non-mutated viral RNA and therefore the true  
85 potency of molnupiravir during omicron infections.

86  
87

88  
89  
90  
91  
92  
93  
94  
95  
96  
97  
98  
99  
100  
101  
102

## Results

### Viral immune dynamic, pharmacokinetic and pharmacodynamic clinical trial simulation models.

We previously described our viral immune dynamic (VID) model that was fit to diverse viral loads from 1510 SARS-CoV-2 infected individuals in the National Basketball Association cohort.<sup>11, 16</sup> The model assumes a finite number of susceptible cells. An eclipse phase delays viral production by infected cells. In keeping with an early innate immune response, susceptible cells become refractory to infection in the presence of infected cells but also revert to a susceptible state at a constant rate. Infected cells are cleared by cytolysis and delayed acquired immunity, which is activated in a time-dependent fashion (**Fig 1a**). We used a mixed-effect population approach implemented in Monolix to estimate model parameters.<sup>17</sup>

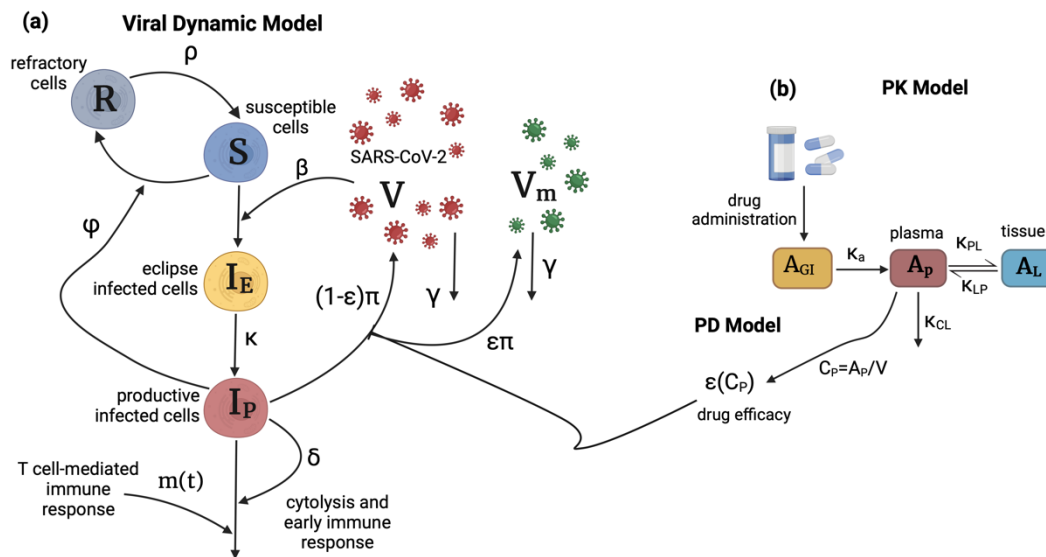

103  
104 **Fig 1. Schematic of the (a) viral dynamic model and (b) molnupiravir PK-PD model.**  
105

106 To reproduce levels of molnupiravir, we used a three-compartment pharmacokinetic (PK) model  
107 (**Fig. 1b**). Using Monolix and the mixed-effect population approach, we estimated parameter  
108 values by fitting the model to the average plasma concentration of healthy subjects.<sup>18</sup> The model  
109 closely recapitulated observed drug levels following multiple doses of 50, 100, 200, 300, 400,  
110 600, and 800 mg given twice daily for five days (**Fig S1, Table S1**). The estimated value for the  
111 transition rate from plasma to peripheral compartment ( ) was dose-dependent in the form of  
112 . All other PK parameters were dose independent. For the pharmacodynamic  
113 (PD) model, we assumed drug efficacy follows a Hill equation with respect to concentration. We  
114 parameterized the model using in vitro efficacy data collected at different concentrations (details  
115 in **Materials and Methods, Fig S2, Table S2**).<sup>19</sup>

116 We combined the VID and PKPD models by using treatment efficacy to convert non-mutated  
117 virus to mutated virus, both of which are assumed to be detected with polymerase chain reaction  
118 (PCR) assays, given the low probability of drug-induced mutations in the PCR primer region.  
119 This assumption is based on the observed drug-induced mutation of approximately 1 in 2000  
120 sites.<sup>20</sup> Given the average length of most PCR primers of ~25 base pairs, the chance of the  
121 primer remaining unmutated after treatment is  $(1999/2000)^{25}$ , or 98.76%. A limitation of viral  
122 load data from the included clinical trials is that it lacks early pre-symptomatic endpoints to  
123 estimate the viral expansion slope. To further train the model, we included 1023 Omicron-  
124 infected participants from the NBA cohort to inform rates of viral upslope in the trials.<sup>11</sup> We first  
125 fit the combined model to individual viral load data from 149 low-risk, symptomatic vaccinated  
126 participants infected with omicron VOCs in the PLATCOV trial (65 treated and 84 controls) and  
127 from 80 high-risk, symptomatic vaccinated participants infected with omicron VOCs in the  
128 PANORAMIC trial (38 treated and 42 controls) (Fig 2a, 2b, Fig S3, S4, S5, S6). We next fit the  
129 combined model to trial endpoint data (mean viral load drop from baseline) reported in three  
130 randomized, controlled trials: PLATCOV (Fig 3a, 4a-d),<sup>4</sup> PANORAMIC (Fig 3b, 4e-h),<sup>3</sup> and  
131 the MOVE-OUT trial with 1093 high-risk unvaccinated symptomatic individuals infected with  
132 pre-omicron VOCs (549 treated + 544 placebo, Fig 3c, 4i-k).<sup>2</sup> All model fitting was using  
133 Monolix with non-linear mixed effects approaches described in the **Materials and Methods**.

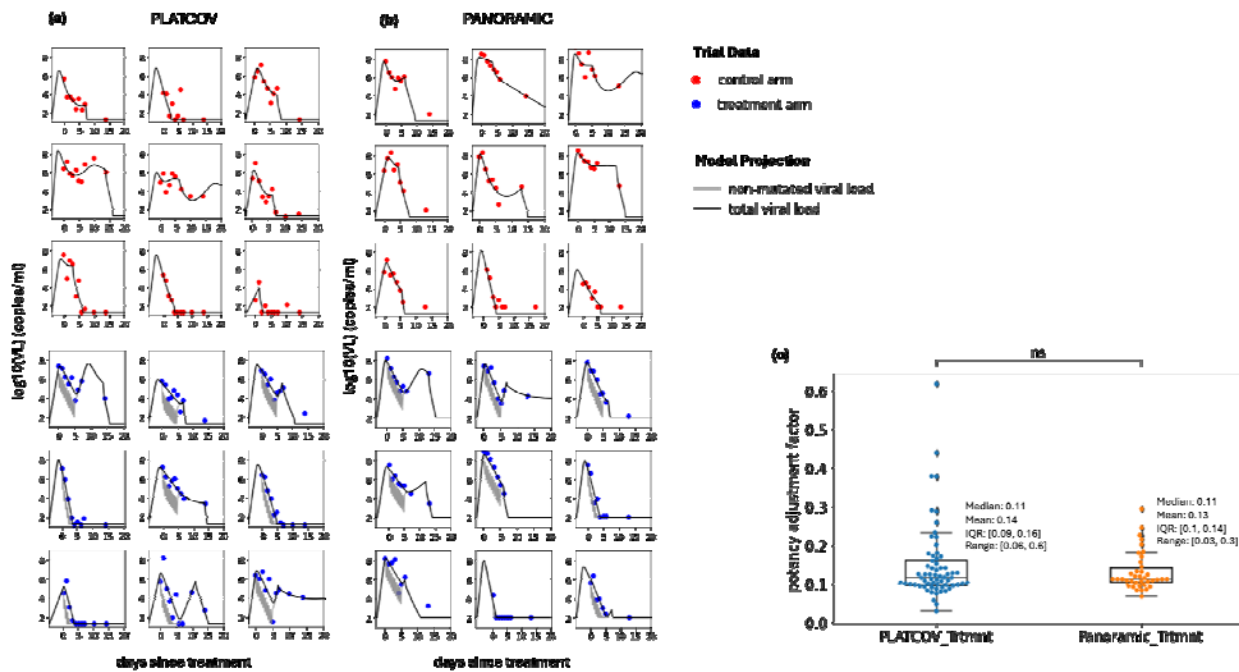

135 **Fig 2. Mathematical model fits of SARS-CoV-2 viral load over time to a subset of study participants**  
136 **in PLATCOV and PANORAMIC receiving no treatment (control) or molnupiravir. (a) Model fits**  
137 **to 9 control and 9 treatment participants in PLATCOV. (b) Model fits to 9 control and 9 treatment**  
138 **participants in PANORAMIC. (c) Individual estimates for potency adjustment factor (ratio of *in vivo* :**  
139 ***in vitro* EC50) in the two trials.**

140 **Model fitting to individual viral load trajectories in PLATCOV and PANORAMIC.**

141 For each participant, we defined the in vivo  $EC_{50}$  as the plasma drug concentration required to  
142 inhibit viral replication by 50% and the potency adjustment factor (paf) as the ratio between the  
143 in vivo and in vitro  $EC_{50}$ .<sup>21, 22</sup> To estimate the paf, we fit the combined VID-PKPD model to  
144 individual viral load data of both arms of PLATCOV and PANORAMIC trials and Omicron  
145 infected individuals in the NBA cohort using the population mixed effect approach in Monolix.  
146 We achieved good model fit to individual viral load trajectories in the control and treatment arms  
147 of PLATCOV (Fig 2a, Fig S3, S4) and PANORAMIC (Fig 2b, S5, S6). The model projected  
148 higher levels of total detected SARS-CoV-2 RNA in most participants relative to non-mutated  
149 viral RNA (Fig 2a,b). We estimated a range of individual paf values with similar mean and  
150 median values estimated for both trials (Fig 2c). These values suggest that in vivo potency of  
151 molunpiravair is on average 7-8 fold higher than in in vitro estimates. Each participant had an  
152 estimated paf less than one indicating that enhanced potency is necessary to include to optimize  
153 fit to the data.  
154

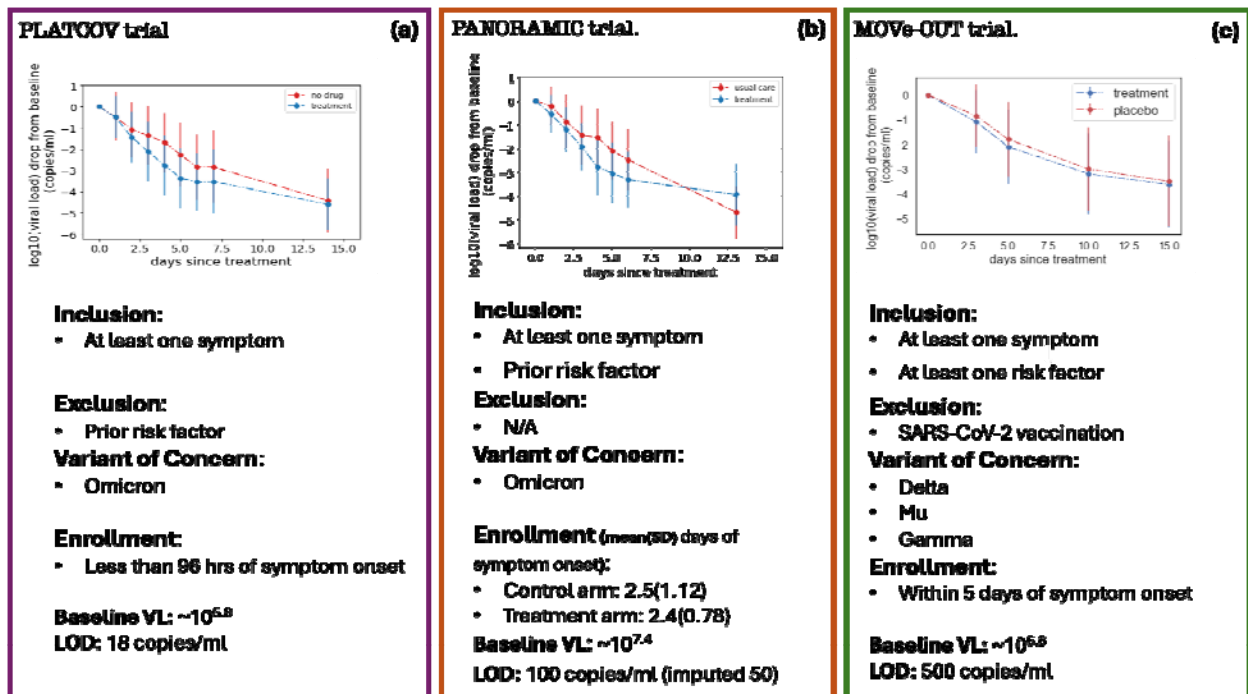

155  
156 **Figure 3. Mean viral load reduction in (a) PLATCOV, (b) PANORAMIC, and (c) MOVE-OUT**  
157 **which are targets for model fitting.**

158  
159 **Model fit to trial virologic endpoint data from PLATCOV, PANORAMIC, and MOVE-**  
160 **OUT.**

161 As a second approach, we assessed whether a virtual cohort strategy where control participants  
162 are modeled from pre-existing cohorts can predict virologic trial endpoints. This approach is  
163 necessary for situations where individual viral load data are not available as with MOVE-OUT  
164 and is important as it demonstrates that the model can reproduce the primary virologic endpoint  
165 of the study. We simulated virtual cohorts using the combined VID-PKPD model and fit results  
166 to viral load decay from baseline in the three trials. For each trial arm, we randomly selected 400  
167 individuals from the NBA cohort with the closest matching viral variant, symptom, and vaccine  
168 status and used their estimated individual viral dynamic parameters in simulations. To address

169 variability in timing of baseline viral load measurement relative to infection, we randomly  
 170 assigned all individuals an incubation period selected from a variant-specific gamma distribution  
 171 found in the literature.<sup>23, 24</sup> Treatment start day was randomly selected from a distribution based  
 172 on observed enrollment windows in the three trials. Due to the lack of individual PK data, the  
 173 same estimated population PK parameters were used for all simulated treated individuals  
 174 (Table S1). PD parameters were randomly selected from a log-normal distribution with  
 175 estimated mean and standard error (Table S2).

176 Our model closely reproduced kinetics of viral decay in PLATCOV in control (Fig 3a, 4a) and  
 177 treatment arms (Fig 3a, 4b) and estimated a  $paf=0.13$  (Fig 4c) similar to our mean estimate using  
 178 individual fits (Fig 2c). The model also predicted individual-level variability in virologic  
 179 responses observed in PLATCOV, including instances of increased viral load following therapy  
 180 (Fig 4d). We compared simulated and actual distributions of viral load change among trial  
 181 participants in the control and treatment arms. On most post-treatment days, simulated and actual  
 182 distributions were not statistically dissimilar. Wider distributions of observed versus simulated  
 183 viral load change were noted on post-randomization days 1 and 2 for control and treatment (Fig  
 184 4d), likely due to noise in viral load data from oral swabs: differences of 1–2 logs were often  
 185 noted between replicates collected from PLATCOV participants at equivalent timepoints,  
 186 particularly on days 1 and 2.<sup>10</sup>  
 187

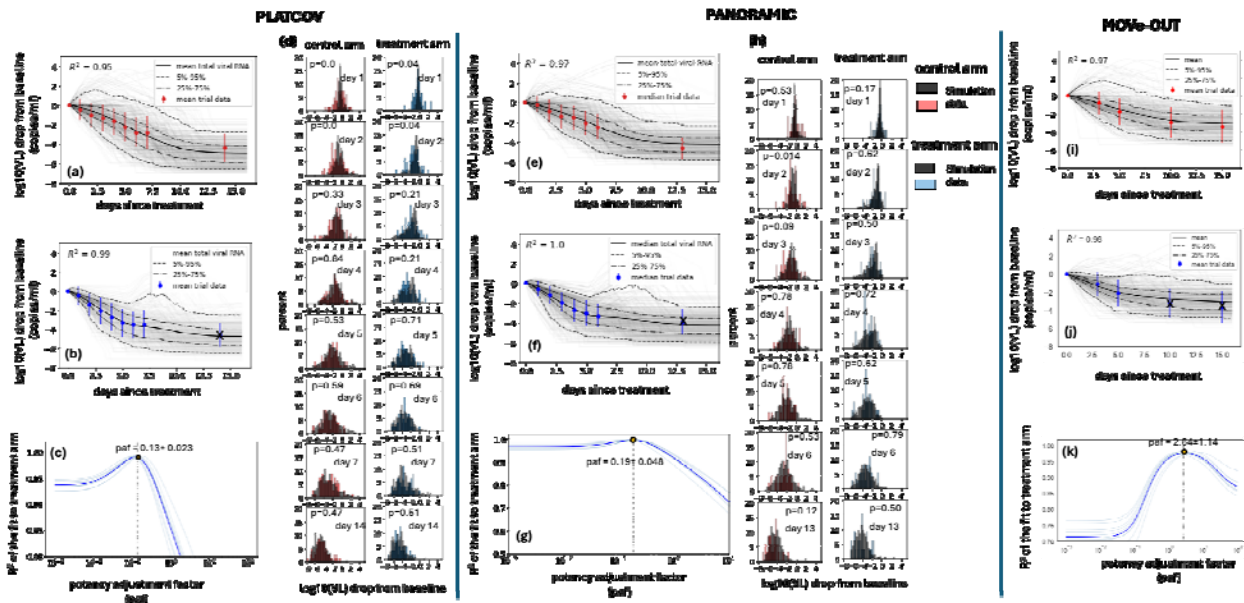

188  
 189 **Figure 4. Model fit to virologic trial outcomes for (a-d) PLATCOV, (e-h) PANORAMIC, (i-k)**  
 190 **MOVE-OUT.** Results include (a, e, i) control groups, (b, f, j) treatment groups, (d,h) comparing  
 191 individual variability of data vs simulation in control and treatment arms, and (c, g, k) estimate for  
 192 potency adjustment factor. To only capture the effect of treatment and address potential identifiability  
 193 issues, data from the first seven days after baseline were used to estimate the paf. Therefore, the crossed-  
 194 out data points were not included in the calculation of the  $R^2$ .  
 195

196 Similarly, our model closely reproduced kinetics of viral decay in PANORAMIC in control (Fig  
 197 3b, 4e) and treatment arms (Fig 3b, 4f) and estimated a  $paf=0.19$  (Fig 4g) similar to our mean  
 198 estimate using individual fits (Fig 2c). The model also predicted individual-level variability in

199 virologic responses observed in PANORAMIC, including instances of increased viral load  
 200 following therapy (Fig 4h). We compared simulated and actual distributions of viral load change  
 201 among trial participants in the control and treatment arms. On all post-treatment days other than  
 202 day 2 control, simulated and actual distributions were not statistically dissimilar (Fig 4h). This  
 203 likely indicates less noise in viral load data from nasopharyngeal swabs collected in  
 204 PANORAMIC relative to oral swabs in PLATCOV.

205  
 206 Finally, the model reproduced kinetics of viral decay in MOVE-OUT in control (Fig 4i) and  
 207 treatment arms (Fig 4j) but estimated a higher  $paf=2.64$  (Fig 4k). The higher  $paf$  maps to the far  
 208 less substantial viral load reduction in MOVE-OUT relative to the other two trials which in turn  
 209 may be explained by less potency against pre-omicron variants which has been observed  
 210 experimentally.<sup>25</sup>

211  
 212 As a further validation step, we performed counterfactual simulations which assess viral kinetics  
 213 of control study participants assuming treatment and treatment participants assuming  
 214 placebo/usual care. Counterfactual control simulations slightly overestimated late viral loads for  
 215 PLATCOV (Fig S7a) and PANORAMIC (Fig S8a). This may be because therapy suppresses  
 216 acquired immune responses, which is not captured in our model.<sup>15</sup> Counterfactual treatment  
 217 simulations fit the data well for PLATCOV (Fig S7b) and PANORAMIC (Fig S8b). Simulations  
 218 occasionally predicted viral rebound following treatment (Fig S7c,d and S8c,d).

219  
 220

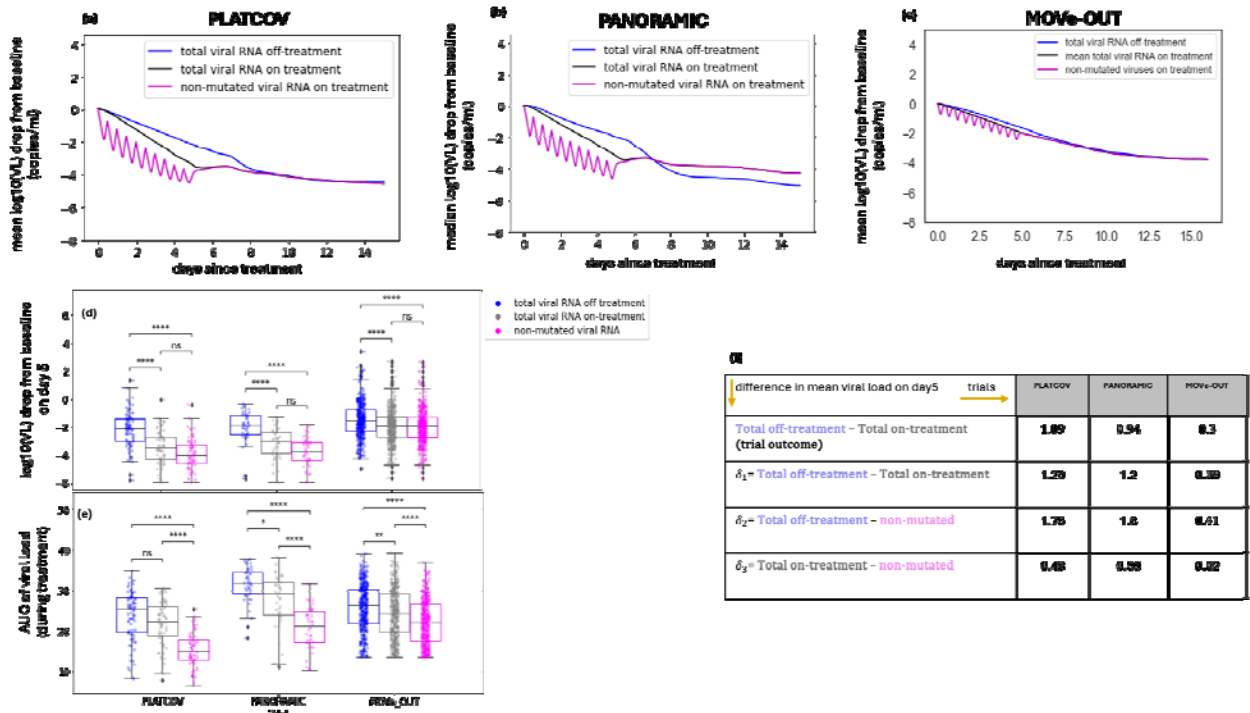

221  
 222 **Figure 5. PCR underestimates the true reduction in non-mutated SARS-CoV-2 RNA in PLATCOV**  
 223 **and PANORAMIC but not MOVE-OUT.** Simulated mean viral loads including non-mutated viral RNA  
 224 in (a) PLATCOV, (b) PANORAMIC and (c) MOVE-OUT. (d) Individual reduction at day 5 in the  
 225 simulated control group (blue), simulated total viral RNA (grey) and simulated non-mutated viral RNA  
 226 (pink) in the three trials showing no statistical difference between total and non-mutated viral RNA



227 despite a lower median. (e) Individual viral area under the curve from the start of the treatment through  
228 day 5 in the simulated control group (blue), simulated total viral RNA (grey), and simulated non-mutated  
229 viral RNA (pink) in the three trials showing a statistical difference between total and non-mutated viral  
230 RNA. Boxplots include the interquartile range (IQR) with whiskers equaling 1.5 the IQR. (f) Table of  
231 mean viral load reductions in the trials and simulations including the predicted mean difference in total  
232 versus mutated viral RNA.

233  
234 **Estimates of reduction in fully mutated viruses versus non-mutated SARS-CoV-2 RNA.**  
235 We used our optimized model with solved paf to project the trajectory of non-mutated viral RNA  
236 during treatment relative to values measured with PCR, which detects viral RNA with drug-  
237 induced mutations.<sup>6</sup> In PLATCOV (Fig 5a,d,f) and PANORAMIC (Fig 5b,d,f), owing to higher  
238 drug potency, total SARS-CoV-2 viral RNA on treatment exceeded non-mutated viral RNA by  
239 ~0.48 and 0.59 log respectively, suggesting that measured endpoints underestimate the drug's  
240 true antiviral effect. However, these differences did not achieve statistical significance, perhaps  
241 because estimated total and non-mutated viral RNA levels converge at drug trough. In MOVE-  
242 OUT (Fig 5c,d,f), there was no significant difference between total SARS-CoV-2 viral RNA on  
243 treatment and non-mutated viral RNA.

244

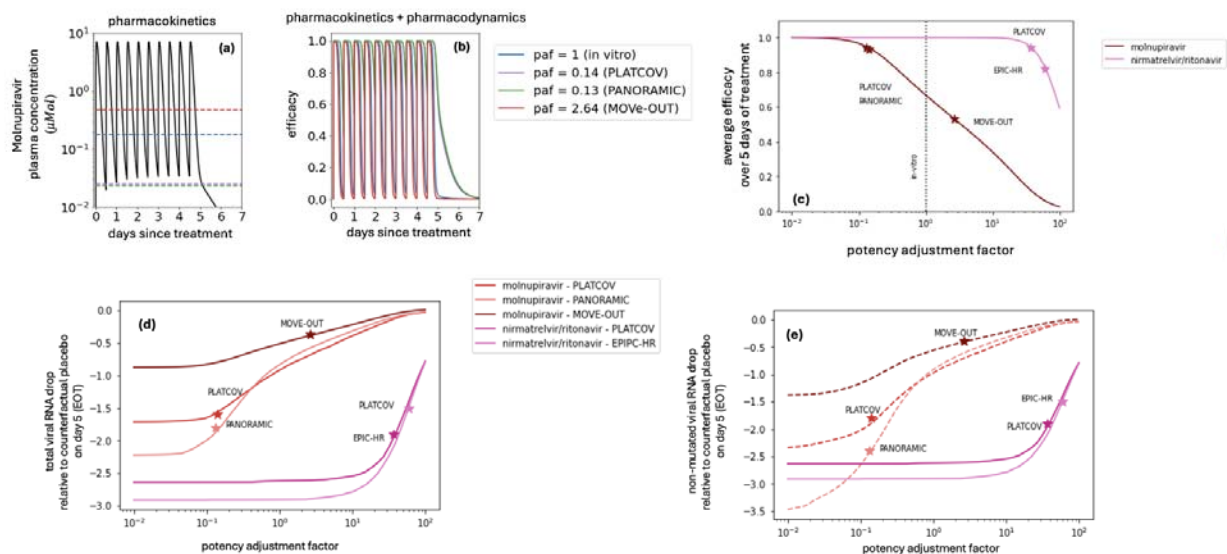

245  
246 **Figure 6. Relationship of drug pharmacokinetics and pharmacodynamics to in vivo potency and**  
247 **viral load reduction.** (a) Molnupiravir plasma concentration during five days of treatment with 800 mg  
248 molnupiravir given twice daily. The dashed lines mark the EC<sub>50</sub> with different paf values which differ by  
249 trial. For Paf = 0.13, drug levels are almost entirely above EC<sub>50</sub>. (b) Dynamic shifts in molnupiravir  
250 efficacy for different paf values which differ by trial. Efficacy only drops minimally at trough levels when  
251 paf is low (i.e. 0.14 and 0.13 in PLATCOV and PANORAMIC) but drops significantly at trough levels in  
252 MOVE-OUT. (c) Drug potency of SARS-CoV-2 antivirals according to trial. The in-vivo efficacy of  
253 molnupiravir in PLATCOV and PANORAMIC trials is close to the in vivo efficacy of  
254 nirmatrelvir/ritonavir in the PLATCOV trial and higher than EPIC-HR. MOVE-OUT potency is  
255 significantly lower due to a higher paf and higher in vivo EC<sub>50</sub> value. (d) Simulated mean drops in total  
256 viral RNA from baseline relative to counterfactual placebo/usual care arms on day 5 in the three  
257 molnupiravir trials and two nirmatrelvir/ritonavir trials. (e) Simulated mean drops in non-mutated viral  
258 RNA from baseline relative to counterfactual placebo on day 5 in the three molnupiravir trials and two  
259 nirmatrelvir/ritonavir trials. In the molnupiravir trials, total viral RNA drops less than non-mutated viral

260 RNA due to PCR detection of drug-mutated viral RNA. Total possible reduction in non-mutated SARS-  
261 CoV-2 RNA is less for MOVE-OUT than PLATCOV and PANORAMIC due to higher initial viral loads  
262 and lower values of detection in the trials.

263  
264 In all 3 trials, the models suggest that non-mutated viral loads during treatment may be lowest at  
265 drug peak, reflecting the short plasma half-life of molnupiravir. Therefore, the cumulative  
266 effective of drug is best estimated with viral area under the curve which accounts for highly  
267 variable drug activity over time due to short drug half-life. By this estimate, the reduction in non-  
268 mutated viral RNA far exceeds that of total measured viral RNA (**Fig 5e**). In the case of MOVE-  
269 OUT, this may explain why significant clinical benefit is associated with only a marginal  
270 reduction in observed decline in total viral RNA. This also suggests that there might be utility to  
271 measure viral load after drug peak and trough for agents with short half-life as viral loads may  
272 differ by a full order of magnitude according to drug level.

273  
274 **Differences in trial participants and model parameters.**

275 We also compared features of each trial as they related to model predictions by assessing the  
276 viral dynamic range in each trial (**Fig S9a**). Control participants in PLATCOV had lower mean  
277 viral loads throughout the course of infection relative to PANORAMIC and MOVE-OUT (**Fig**  
278 **S9b**). Given PLATCOV and PANORAMIC enrolled participants with the omicron variant, we  
279 surmise that these differences relate to demographic differences in study participant  
280 demographics, slightly shorter estimated time to treatment in PANORAMIC versus PLATCOV  
281 estimated by our model ( $t_0$  in **Fig S10**), and/or characteristics of the PCR assay used in the  
282 studies. The trials also employed different limits of detection which impacted observed  
283 reductions in viral load (**Fig S9b**). Model parameters were largely equivalent between studies  
284 and between treatment and control arms, reflecting the flexibility of the model (**Fig S10**). The  
285 parameter governing transition of susceptible cells to a refractory state was higher in PLATCOV  
286 relative to PANORAMIC which likely was necessary to achieve lower viral loads overall and  
287 may reflect the younger study participants (**Fig S10**).

288  
289 **Antiviral potency, viral load assessment and trial design all impact observed antiviral**  
290 **reduction.**

291 We next combined PK and PD models to assess the average efficacy of the drug during days 0-5  
292 in all three trials (**Fig 6a,b**) and noted an efficacy of 53% in MOVE-OUT (**Fig 6c**). The efficacy  
293 of molnupiravir in PLATCOV (94%) and PANORAMIC (95%) was similar to that of  
294 nirmatrelvir in PLATCOV (94%) and EPIC-HR (82%) owing to a much lower paf for  
295 molnupiravir relative to nirmatrelvir / ritonavir (**Fig 6c**).

296  
297 These potencies mapped to different reductions in viral load relative to placebo/usual care. Total  
298 viral RNA reduction in PANORMIC and PLATCOV exceeded that in MOVE-OUT owing to  
299 lower paf (**Fig 6d**), but also due to a larger viral dynamic range (defined as the distance from  
300 baseline viral load to the lower threshold PCR (LOD) (**Fig S9b**)), which allows for a greater  
301 observed reduction in viral load. PANORAMIC used LOD = 100 (imputed as 50), and  
302 PLATCOV had  $\text{LOD} \cong 18$  (copies/ml), versus LOD = 500 copies/ml for MOVE-OUT.  
303 PANORAMIC also had much higher average starting viral loads (7.4 log<sub>10</sub> (copies/ml)) versus  
304 PLATCOV (5.8 log<sub>10</sub> copies/ml) and MOVE-OUT (6.8 log<sub>10</sub> copies/ml) (**Fig S9b**).  
305 Molnupiravir approached maximal possible total viral load viral RNA reduction in

306 PANORAMIC and PLATCOV, whereas protease inhibitors could still achieve greater viral load  
307 reduction at lower paf (**Fig 6d**) as recently observed with ensitrelvir.<sup>26</sup>

308  
309 The greater possible reduction in total viral load for protease inhibitors relative to molnupiravir  
310 owes to different mechanisms of action. Model projected reductions in non-mutated viral RNA  
311 reduction in PANORMIC and PLATCOV approximated viral load reductions observed in EPIC-  
312 HR and PLATCOV on nirmatrelvir / ritonavir (**Fig 6e**), suggesting that PCR detection of mutated  
313 viruses underestimates true molnupiravir potency and that a more potent mutagenic agent could  
314 accrue further virologic benefit.

315  
316 **Optimization of molnupiravir therapy to avoid viral rebound.**

317 Instances of viral rebound were observed in PLATCOV and PANORAMIC and have been  
318 observed following molnupiravir treatment.<sup>4, 27</sup> We analyzed higher doses and prolonged therapy  
319 and noted that as with nirmatrelvir, prolonging therapy is a better method to prevent rebound  
320 than increasing dose (**Fig S11**).

321

322

323

## 324 Discussion

325  
326 We recapitulated the virologic results of three clinical trials of molnupiravir with our combined  
327 clinical trial simulation VID/PK/PD models. Model output highlights key differences in viral  
328 load reduction between the trials and identifies mechanistic differences to explain this. The  
329 MOVE-OUT trial was associated with significantly less reduction in viral load between treatment  
330 and control arms than the other two trials. Accordingly, the drug efficacy (0.53) was lower in this  
331 trial, and our estimate for paf was 2.64, signifying marginally lower potency in vivo than in vitro.  
332 This result is compatible with 0.4-fold lower median EC50 values for molnupiravir in vitro  
333 against omicron relative to prior variants.<sup>25</sup> The higher paf in MOVE-OUT permitted drug  
334 troughs below the EC50, limiting potency throughout the dosing interval. In PLATCOV and  
335 PANORAMIC, our model suggests drug levels remain above the in vivo EC50 throughout the  
336 dosing interval though potency does fluctuate according to drug level.

337  
338 The estimated drug efficacy in PLATCOV and PANORAMIC was considerably higher (0.94 and  
339 0.95, respectively), and the paf was estimated to be 0.14 and 0.13, indicating greater potency in  
340 vivo than in vitro. We have applied our clinical trial simulation technique to multiple drugs for  
341 SARS-CoV-2,<sup>10</sup> HSV-2,<sup>21, 22</sup> and HIV,<sup>28</sup> and this is the first time we have identified this trend.  
342 Allowing molnupiravir to be more potent in vivo in our modeling of PLATCOV and  
343 PANORAMIC was necessary to capture the much greater reduction in total viral RNA relative to  
344 off-treatment in these studies (1.09 log and 0.94 log respectively versus 0.3 log in MOVE-OUT).

345  
346 A key outcome of our analysis is that SARS-CoV-2 PCR likely underestimates molnupiravir  
347 potency because it still detects drug-mutated viral RNA.<sup>6</sup> This appears to be most significant  
348 when antiviral potency is higher, as in PANORAMIC and PLATCOV, leading to a 0.48-0.59 log  
349 underestimation of reduction in non-mutated virus. Our results suggest that use of standard PCR  
350 for assessing SARS-CoV-2 levels may lead to underestimation of drug potency. Multi probe  
351 assays as have been used for the HIV reservoir may improve specificity for viruses that remain  
352 intact and replication competent.<sup>29</sup> Viral culture is potentially a useful metric but lacks sufficient  
353 sensitivity and precision and is too labor intensive to serve as a viable trial endpoint.<sup>12</sup>

354  
355 Our results suggest that viral loads may vary according to drug level given molnupiravir's short  
356 plasma half-life. A sub-study within future trials comparing viral loads between drug trough and  
357 peak would be useful for the field. This could validate our model's prediction that even small  
358 reductions in viral RNA may be associated with substantial reductions in total viral area under  
359 the curve (a surrogate for infection surface area) particularly with a short half-life drug. Even  
360 minor reductions in viral load may be associated with substantial clinical benefit in this case.  
361 These fluctuations may be less evident if the intra-cellular half-life of the drug is longer or if PK  
362 measures in our model underestimate true drug levels in PANORMIC due to older age or  
363 impaired renal clearance. Model accuracy would be improved if viral load and PK data were  
364 available from the same patients in similar trials.

365  
366 Another key practical outcome is that as for nirmatrelvir, extension of molnupiravir therapy to 10  
367 days is likely to prevent rebound though our simulations do not suggest any benefit from  
368 increasing dose.<sup>10</sup> This suggests that prolonging therapy or using longer half-life agents is ideal  
369 for treating SARS-CoV-2.<sup>30</sup>

370

371 Each trial represented a unique set of issues for model fitting. In MOVE-OUT, because the  
372 treatment arm mean viral kinetics curve differed only slightly from the control arm, the model  
373 without drug provided reasonable fit to the treatment arm. Nevertheless, the paf was identifiable  
374 for this trial indicating that the model was able to detect and specify the very limited potency of  
375 the drug. The fact that the drug's potency and clinical efficacy appears to have increased with  
376 introduction of the omicron variant demonstrates a massive challenge for the therapeutics field:  
377 as with vaccines, trials performed when prior variants were circulating may prove less relevant  
378 as new variants continually emerge. A priority should be retesting existing agents against newly  
379 emerging variants in small nimble trials such as PLATCOV, with viral load endpoints.

380

381 For PLATCOV, the model for the treatment arm matched the trial data very precisely and  
382 identified the paf. The drug achieved nearly maximal observed viral load reduction in this trial.  
383 We identified a similar trend for PANORAMIC. It is notable that the model had the flexibility to  
384 account for different viral loads between these trials by predicting more rapid innate immune  
385 responses in PLATCOV.

386

387 We arrived at similar estimate for paf in PLATCOV and PANORAMIC, while using two separate  
388 methods: fitting to individual viral loads and fitting to mean viral load reduction trial endpoints.  
389 This suggests that our approach using in silico cohorts and fitting to population level outcomes  
390 produces reliable results.<sup>10</sup> In many cases, it remains challenging for academics to obtain  
391 individualized data from industry sponsored trials. Therefore, it is important that the endpoint  
392 fitting approach should be considered when this is the only data available.

393

394 Finally, our results highlight challenges in trial design associated with the selection of PCR  
395 assays and limits of detection. Different limits of detection were selected for each trial which in  
396 turn impacts the degree of viral load decrease that can be observed. Initial viral loads were  
397 notably higher in PANORAMIC and MOVE-OUT than PLATCOV. The equivalent viral loads  
398 between PANORAMIC and PLATCOV may reflect a more sensitive PCR in the PANORAMIC  
399 study as past immunity has consistently predicted lower viral loads and more rapid viral  
400 elimination for omicron variants.<sup>11, 31</sup> On the other hand, PANORMIC viral loads could have  
401 been higher than in PLATCOV despite both enrolling omicron infections due to an older and less  
402 healthy population. Ideally, equivalent internationally standardized PCR quantitation would be  
403 used across all trials.

404

405 Our study has a couple of limitations. The estimated paf is based on the in vitro assay data  
406 against delta variant in Calu-3 cells. In vitro EC50 is sensitive to assay conditions, including cell  
407 type, the variant of concern, the multiplicity of infection (MOI), and specific lab. In general, the  
408 inability of in vitro assays to match in vivo conditions makes it an unreliable proxy for the in  
409 vivo potency of the drug and explains the necessity of incorporating the paf parameter when  
410 simulating an antiviral clinical trial.

411

412 In our model, we assumed all mutated viruses are noninfectious. While most drug-induced  
413 random mutations reduce the fitness/viability of the virus, the molnupiravir mutation signature  
414 has been detected in circulating variants, especially in regions where the drug has been used most  
415 commonly.<sup>7</sup> Furthermore, in the PANORAMIC study, no statistical difference was observed

416 between the rate of culturable samples in the treatment and control arms which implies some  
417 mutated viruses might be transmissible.<sup>32</sup>

418  
419 PK parameters were estimated using the data from the plasma concentration of healthy  
420 individuals with the age range of 19-60 (mean 39.6) years old. The clearance rate of renally  
421 cleared drugs often increase with age.<sup>33</sup> This implies that the paf may be larger in an older  
422 population, such as in PANORAMIC participants. Further, we used the plasma concentration in  
423 the PD model to calculate the drug efficacy. However, using the drug's intracellular  
424 concentration with a longer half-life, represented by the central compartment of the PK model,  
425 would also likely lead to a larger estimated paf.

426  
427 In summary, we further demonstrate the utility of clinical trial simulation using models that  
428 capture drug PK and PD, as well as infection dynamics. In the case of molnupiravir, our results  
429 suggest that final viral endpoints should be adjusted based on the drug's mechanism of action.

430  
431

## 432 **Materials and Methods**

433

### 434 **Study Design.**

435 We developed a viral dynamics model recapitulating viral load data collected from symptomatic  
436 individuals in the NBA (National Basketball Association) cohort.<sup>11</sup> We used a two-compartment  
437 model to reproduce the PK data of molnupiravir.<sup>18</sup> For clinical trial simulation, we constructed a  
438 virtual cohort by randomly selecting 400 individuals from the NBA cohort, trying to match the  
439 trial populations regarding vaccine status and history of infection. Due to lack of individual PK  
440 data, we used estimated population PK parameters for all individuals in the virtual cohort. The  
441 PD parameters for each individual were randomly selected from a log-normal distribution with  
442 their estimated means and standard errors. We fit the combined viral dynamic and PKPD model  
443 to the average change in viral load from the baseline of the control and treatment arms of three  
444 previously published molnupiravir clinical trials.<sup>2-4, 34</sup> Comparing our model to the control arms  
445 validated our viral dynamic model and demonstrated how well our virtual cohorts represent the  
446 trial control arms. We used the average data from the treatment arms to estimate the potency  
447 adjustment factor (paf) by maximizing the  $R^2$  of the fit.<sup>10</sup> We also fit to individual viral load  
448 trajectories in PLATCOV and PANORAMIC using the mixed-effect population approach  
449 implemented in Monolix<sup>35-37</sup> and obtained both individual paf values and a population  
450 distribution.

### 451 **Viral load data**

452 The NBA cohort dataset published by Hay et al consists of 2875 documented SARS-CoV-2  
453 infections in 2678 people detected through frequent PCR testing regardless of symptoms.<sup>16</sup> We  
454 used the viral load data from 1510 infections in 1440 individuals that had at least 4 positive  
455 quantitative samples to estimate viral dynamic parameters. We used parameter sets estimated for  
456 the symptomatic subpopulation of these individuals to construct virtual cohorts.<sup>11</sup>

### 457 **Clinical trial data**

458 We used viral load data from three molnupiravir clinical trials. MOVE-OUT by Jayk Bernal et al.  
459 included 544 and 549 symptomatic high-risk individuals in the control and treatment arms,  
460 respectively.<sup>2</sup> We obtained the average change in viral load data of the control and treatment  
461 arms as shared in the supplementary material of their published manuscript in Table S6. Nasal  
462 viral load was measured using PCR assay on days 0, 3, 5, 10, and 14 after the treatment start day  
463 and adjusted by the baseline viral load. The lower limit of detection (LOD) of 500 copies/ml  
464 were used in this trial. The treatment was started within five days of symptom onset.

465 PLATCOV by Schilling et al. is an open-label, randomized, controlled adaptive trial with 85 and  
466 58 symptomatic, young, healthy individuals in the control and molnupiravir treatment arms,  
467 respectively.<sup>4</sup> The oropharyngeal samples from each participant were collected daily on days 0  
468 through 7 and on day 14 after the treatment start day, and viral load was measured using PCR  
469 assay. We used the individual viral load data published by the authors. From PLATCOV, we  
470 averaged over the two oral samples collected from each individual and calculated viral load drop  
471 from baseline or used the individual-level viral load data. We used the maximum LOD reported  
472 in the published data (~1.26 log).

473 PANORAMIC is a platform adaptive randomized, controlled trial with 42 and 38 symptomatic,  
474 vaccinated individuals with at least one risk factor in the control and treatment arms,

475 respectively.<sup>3</sup> Nasal viral load was measured using PCR and samples were collected on days 0  
476 through 6 and on day 13. We used individual viral load data shared by the authors and adjusted  
477 by baseline viral load to obtain mean viral load drop from the baseline. Mean days since  
478 symptom onset at baseline (sd) were 2.4 (0.78) for the treatment arm and 2.5(1.12) for the  
479 control arm. The lower limit of detection of 100 copies/ml (imputed as 50 copies/ml) was used.

480 In all three trials, the study participants were treated with 800mg molnupiravir twice per day, for  
481 five days.

#### 482 **PK data**

483 Mean plasma concentration data of molnupiravir were obtained by digitizing Figure 3 of the  
484 phase I trial by Painter et al. using WebPlotDigitizer.<sup>18</sup> The data used in this paper belong to the  
485 multiple-ascending part of the phase I trial where six participants were given 50, 100, 200, 300,  
486 400, 600, and 800 mg of molnupiravir twice daily for 5.5 days, and their plasma concentrations  
487 were measured after the first and last doses.

#### 488 **PD data**

489 The data on drug efficacy was obtained from experiments performed at the University of  
490 Washington. The efficacy of molnupiravir was measured against the delta variant of SARS-  
491 CoV2 in Calu-3 cells (human lung epithelial). Briefly, Calu 3 cells were treated with varying  
492 concentrations of molnupiravir prior to infection with SARS-CoV-2 (delta isolate) at a  
493 multiplicity of infection of 0.01. Antiviral efficacy and cell viability (of non-infected cells treated  
494 with drugs) were assessed as described.<sup>9, 10</sup> There were five replicates per condition, pooled from  
495 2 independent technical experimental repeats (one experiment with triplicate conditions, one  
496 experiment in duplicate conditions).

#### 497 **Viral dynamics model**

498 We used our model of SARS-CoV-2 dynamics to model the viral load of symptomatic  
499 individuals with SARS-CoV-2 infection.<sup>11</sup> Our model assumes that susceptible cells (S) are  
500 infected at rate  $\beta SV$  by SARS-CoV-2 virions. The infected cells go through a non-productive  
501 eclipse phase ( $I_E$ ) before producing viruses and transition to becoming productively infected  
502 ( $I_P$ ) at rate  $\kappa I_E$ . When encountering productively infected cells, the susceptible cells become  
503 refractory to infection (R) at the rate  $\phi I_P S$ . Refractory cells revert to a susceptible state at rate  
504  $\rho R$ . The productively infected cells produce virus at the rate  $\pi I_P$  and are cleared at rate  $\delta I$   
505 representing cytolysis and the innate immune response that lacks memory and is proportional to  
506 the amount of ongoing infection. If the infection persists longer than time  $\tau$ , then cytotoxic  
507 acquired immunity is activated, which is represented in our model by the rate  $m I_P$ . Finally, free  
508 virions are cleared at the rate  $\gamma$ . Of note, this model, previously proposed by Ke et al. was  
509 selected against other models based on superior fit to data and parsimony.<sup>38</sup> The model written as  
510 a set of differential equations has the form,

511

$$512 \quad \frac{dS}{dt} = -\beta SV - \phi I_P S + \rho R \quad (1a)$$

$$513 \quad \frac{dR}{dt} = \phi I_P S - \rho R \quad (1b)$$

$$514 \quad \frac{dI_E}{dt} = \beta SV - \kappa I_E \quad (1c)$$



$$515 \quad \frac{dI_P}{dt} = \kappa I_E - \delta I_P - m(t)I_P \quad (1d)$$

$$516 \quad \frac{dV}{dt} = \pi I_P - \gamma V \quad (1e)$$

$$517 \quad \text{where } \begin{cases} m(t) = 0 & t < \tau \\ m(t) = m & t \geq \tau \end{cases} \quad (1f)$$

518

519 To estimate parameter values, we fit the model to viral load data from the NBA cohort using a  
520 mixed-effect population approach implemented in Monolix. Details on the model selection and  
521 fitting process can be found in Owens et al.<sup>11</sup>

522 We start the simulations with  $10^7$  susceptible cells. The initial value of the refractory cells is  
523 assumed to be zero since the interferon signaling is not active prior to infection. We further  
524 assume there are no infected cells (eclipse or productive) at the beginning of the infection. We  
525 fix the level of inoculum ( $V_0$ ) at 97 copies/ml for each individual.

526 To resolve identifiability issues, we fixed two parameter values, setting the inverse of the eclipse  
527 phase duration to  $\kappa = 4$ , and the rate of clearance of virions to  $\gamma = 15$ .<sup>11</sup>

## 528 **PK model**

529 We used a two-compartmental PK model which includes the amount of drug in the GI tract  
530 ( $A_{GI}$ ), the plasma compartment ( $A_P$ ), and the respiratory tract ( $A_L$ ). The drug is administered  
531 orally, passes through the GI tract and gets absorbed into the blood at the rate  $\kappa_a$ . The drug then  
532 transfers from the blood into the peripheral compartment (or the lung) at the rate  $\kappa_{PL}$ . The  
533 metabolized drug transfers back into the plasma at the rate  $\kappa_{LP}$  from where it clears from the  
534 body at the rate  $\kappa_{CL}$ . The model in the form of ordinary differential equations is written as,

$$535 \quad \frac{dA_{GI}}{dt} = -\kappa_a A_{GI} \quad (2a)$$

$$536 \quad \frac{dA_P}{dt} = \kappa_a A_{GI} + \kappa_{LP} A_L - (\kappa_{CL} + \kappa_{PL}) A_P \quad (2b)$$

$$537 \quad \frac{dA_L}{dt} = \kappa_{PL} A_P - \kappa_{LP} A_L \quad (2c)$$

538

539 We used Monolix and a mixed-effect population approach to estimate the parameters and their  
540 standard deviations. With the initial condition of ( $A_{GI} = \text{Dose}$ ,  $A_P = 0$ ,  $A_L = 0$ ); we fit  $C_P = \frac{A_P}{V_{ol}}$   
541 to the plasma concentration data where  $V_{ol}$  is the estimated plasma volume. Details on  
542 parameter values and the error model provided in **Table S1**.

543

## 544 **PD model**

545 For the pharmacodynamics model we used Hill equation,  $\epsilon(t) = \frac{E_{max}C(t)^n}{C(t)^n + EC_{50}^n}$ , where  $C(t)$  is the  
546 drug concentration in plasma,  $E_{max}$  is the maximum efficacy,  $n$  is the Hill coefficient, and  $EC_{50}$   
547 is the drug concentration in plasma required for 50% efficacy. We used least-squared fitting to

548 obtain the three parameters ( $E_{max}$ ,  $n$ , and  $EC_{50}$ ) and their standard deviations. The average drug  
549 efficacy is measured using,

$$550 \quad E_{ave} = \frac{1}{t_{start} - t_{end}} \int_{t_{start}}^{t_{end}} \epsilon(t) dt \quad (3)$$

551 Where  $t_{start}$  and  $t_{end}$  are the treatment start day and end day, respectively.

552

### 553 **Combined PKPD and VL models**

554 The plasma concentration of molnupiravir obtained from the PK model is used in the PD model  
555 to obtain time-dependent efficacy. Since molnupiravir imposes lethal mutations during the virus  
556 replication process, in our model, a portion of produced viruses, measured by  $\epsilon(t)$ , are mutated  
557 ( $V_m$ ) and therefore assumed to be non-infectious, with the addition that most detected viral RNA  
558 pre-treatment is also non-infectious. The production rate of non-mutated viruses is decreased by  
559 a factor of  $(1 - \epsilon(t))$ . Equation 1e is written as,

$$560 \quad \frac{dV}{dt} = (1 - \epsilon(t))\pi I_P - \gamma V \quad (4a)$$

$$561 \quad \frac{dV_m}{dt} = (\epsilon(t))\pi I_P - \gamma V_m \quad (4b)$$

562 Total viral load ( $V + V_m$ ) is used to fit the trial data.

### 563 **Fitting the combined model to individual viral load data in the PLATCOV trial**

564 We used the population mixed-effect approach and Monolix to estimate each individual's viral  
565 dynamics parameters and the potency adjustment factor (paf). Due to the lack of data from the  
566 initial phase of infection in the PLATCOV and PANORAMIC trials, we include the data from  
567 Omicron-infected individuals in the NBA cohort to inform the model about the initial phase of  
568 infection. We fixed the PK parameters to the estimated population values (**Table S1**), and the PD  
569 parameters other than  $EC_{50}$  to the in vitro estimated population values (**Table S2**). We used the  
570 study category (NBA vs PLATCOV and PANORAMIC) as a covariate for  $t_0$  (timing of  
571 infection) and  $\tau$  (timing of the adaptive immune response) since the first recorded positive test is  
572 likely much later for the clinical trials. In the NBA study, samples were collected almost daily  
573 regardless of symptoms often leading to pre-symptomatic detection, while in the PLATCOV  
574 study, the baseline measurement occurred after symptom onset, trial enrollment and consent.

### 575 **Construction of a virtual cohort**

576 To generate a cohort for our simulated clinical trials, we randomly selected 400 individuals (for  
577 each arm of the simulated trials) from the unvaccinated symptomatic subpopulation of the NBA  
578 cohort for MOVE-OUT and the vaccinated, Omicron infected subpopulation for PLATCOV and  
579 PANORAMIC and used their individual viral load parameters estimated by fitting our viral  
580 dynamics model to the data. A sample size of  $n=400$  (out of 822 vaccinated individuals with  
581 Omicron infection) was used to mimic a large-scale clinical trial and maintain relatively low  
582 overlap between virtual cohorts used in each arm of the simulations and between different  
583 simulations. Since the time of symptom onset is not available for all individuals in the NBA data,  
584 we randomly drew an incubation period for each individual from gamma distributions with  
585 variant-specific parameters estimated by Gamiche et al.<sup>39</sup> The start of treatment relative to  
586 symptom onset was randomly selected according to a uniform distribution for MOVE-OUT and

587 PLATCOV, and a logit normal distribution for PANORAMIC with limits of [0,5] days and mean  
588 and standard deviation reported in the PANORAMIC trial for control and treatment arms. The  
589 same population PK parameters were assigned to each individual. The relevant dose in each  
590 scenario was added to the  $A_{GI}$  compartment (the absorption equation) of the PK model (eq 2a) at  
591 each dosing timepoint ( $t=0, 0.5, 1, 1.5, \dots, 4.5$  days). For each dose, the appropriate PK  
592 parameter were used (Table S1). PD parameters were also randomly drawn from a log-normal  
593 distribution with the estimated mean and standard deviation. The standard deviation of the PD  
594 parameters represents the accuracy of the assays and not individual variability.

### 595 **Potency adjustment factor (paf)**

596 The paf is defined as,

$$597 \quad \text{paf} = \frac{EC_{50, in vivo}}{EC_{50, in vitro}} \quad (5)$$

598

599 We estimated the paf by maximizing  $R^2$  when fitting the change in viral load of the treatment  
600 arm of our simulation to the data from day 0 to day 7 of the treatment arm of the clinical trial.

601

### 602 **Measuring rebound probability**

603 A viral load rebound in the treatment arm was defined when the viral load at any time after  
604 treatment ended exceeded the viral load at the end of the treatment by 1 log. In the control group,  
605 viral rebound was defined in patients who had at least two peaks with minimum height of 1000  
606 copies/ml in their viral load trajectories and the second peak was 1 log higher than its preceding  
607 local minimum.

608

### 609 **Software:**

610 All the model fittings in this study were performed using Monolix version 2023R1.

611 The data analysis and simulations were performed using Python 3.9.12.

### 612 **Data availability:**

613 The data analyzed in this work was previously published by Hay et al. and Schilling et al. and is  
614 available on GitHub at

615 <https://github.com/gradlab/SC2-kinetics-immune-history> and  
616 <https://github.com/jwatowatson/PLATCOV-Molnupiravir/tree/V1.0>

617 Pharmacodynamics data is available on GitHub at  
618 <https://github.com/sEsmaeili/MolnupiravirModeling>

619

### 620 **Code availability:**

621 All codes and materials used in the analysis are available on GitHub

622 <https://github.com/sEsmaeili/MolnupiravirModeling>

### 623 **Funding:**

624 This work is supported by NIAID R01AI77512-01 (JTS, SP).

625 **References**

626

- 627 1. Abdelnabi R, Foo CS, De Jonghe S, Maes P, Weynand B, Neyts J. Molnupiravir Inhibits  
628 Replication of the Emerging SARS-CoV-2 Variants of Concern in a Hamster Infection Model. *J*  
629 *Infect Dis.* 2021;224(5):749-53. doi: 10.1093/infdis/jiab361. PubMed PMID: 34244768;  
630 PMID: PMC8408768.
- 631 2. Jayk Bernal A, Gomes da Silva MM, Musungaie DB, Kovalchuk E, Gonzalez A, Delos  
632 Reyes V, Martín-Quirós A, Caraco Y, Williams-Diaz A, Brown ML, Du J, Pedley A, Assaid C,  
633 Strizki J, Grobler JA, Shamsuddin HH, Tipping R, Wan H, Paschke A, ..., Group M-OS.  
634 Molnupiravir for Oral Treatment of Covid-19 in Nonhospitalized Patients. *N Engl J Med.*  
635 2022;386(6):509-20. Epub 20211216. doi: 10.1056/NEJMoa2116044. PubMed PMID:  
636 34914868; PMID: PMC8693688.
- 637 3. Butler CC, Hobbs FDR, Gbinigie OA, Rahman NM, Hayward G, Richards DB, Dorward  
638 J, Lowe DM, Standing JF, Breuer J, Khoo S, Petrou S, Hood K, Nguyen-Van-Tam JS, Patel MG,  
639 Saville BR, Marion J, Ogburn E, Allen J, ..., Group PTC. Molnupiravir plus usual care versus  
640 usual care alone as early treatment for adults with COVID-19 at increased risk of adverse  
641 outcomes (PANORAMIC): an open-label, platform-adaptive randomised controlled trial. *Lancet.*  
642 2023;401(10373):281-93. Epub 20221222. doi: 10.1016/S0140-6736(22)02597-1. PubMed  
643 PMID: 36566761; PMID: PMC9779781.
- 644 4. Schilling WHK, Jittamala P, Watson JA, Boyd S, Luvira V, Siripoon T, Ngamprasertchai  
645 T, Batty EM, Cruz C, Callery JJ, Singh S, Saroj M, Kruabkontho V, Ngernseng T,  
646 Tanglakmankhong N, Tubprasert J, Abdad MY, Madmanee W, Kouhathong J, ..., Group PC.  
647 Antiviral efficacy of molnupiravir versus ritonavir-boosted nirmatrelvir in patients with early  
648 symptomatic COVID-19 (PLATCOV): an open-label, phase 2, randomised, controlled, adaptive  
649 trial. *Lancet Infect Dis.* 2024;24(1):36-45. Epub 20230928. doi: 10.1016/S1473-3099(23)00493-  
650 0. PubMed PMID: 37778363; PMID: PMC7615401.
- 651 5. Hammond J, Leister-Tebbe H, Gardner A, Abreu P, Bao W, Wisemandle W, Baniecki M,  
652 Hendrick VM, Damle B, Simón-Campos A, Pypstra R, Rusnak JM, Investigators E-H. Oral  
653 Nirmatrelvir for High-Risk, Nonhospitalized Adults with Covid-19. *N Engl J Med.*  
654 2022;386(15):1397-408. Epub 20220216. doi: 10.1056/NEJMoa2118542. PubMed PMID:  
655 35172054; PMID: PMC8908851.
- 656 6. Fountain-Jones NM, Vanhaefen R, Williamson J, Maskell J, Chua IJ, Charleston M,  
657 Cooley L. Effect of molnupiravir on SARS-CoV-2 evolution in immunocompromised patients: a  
658 retrospective observational study. *Lancet Microbe.* 2024;5(5):e452-e8. Epub 20240322. doi:  
659 10.1016/S2666-5247(23)00393-2. PubMed PMID: 38527471.
- 660 7. Sanderson T, Hisner R, Donovan-Banfield I, Hartman H, Løchen A, Peacock TP, Ruis C.  
661 A molnupiravir-associated mutational signature in global SARS-CoV-2 genomes. *Nature.*  
662 2023;623(7987):594-600. Epub 20230925. doi: 10.1038/s41586-023-06649-6. PubMed PMID:  
663 37748513; PMID: PMC10651478.
- 664 8. Rosenke K, Lewis MC, Feldmann F, Bohrsen E, Schwarz B, Okumura A, Bohler WF,  
665 Callison J, Shaia C, Bosio CM, Lovaglio J, Saturday G, Jarvis MA, Feldmann H. Combined  
666 molnupiravir-nirmatrelvir treatment improves the inhibitory effect on SARS-CoV-2 in macaques.  
667 *JCI Insight.* 2023;8(4). Epub 20230222. doi: 10.1172/jci.insight.166485. PubMed PMID:  
668 36574296; PMID: PMC9977490.

- 669 9. Wagoner J, Herring S, Hsiang TY, Ianevski A, Biering SB, Xu S, Hoffmann M,  
670 Pöhlmann S, Gale M, Aittokallio T, Schiffer JT, White JM, Polyak SJ. Combinations of Host-  
671 and Virus-Targeting Antiviral Drugs Confer Synergistic Suppression of SARS-CoV-2. *Microbiol*  
672 *Spectr.* 2022;10(5):e0333122. Epub 20221003. doi: 10.1128/spectrum.03331-22. PubMed PMID:  
673 36190406; PMCID: PMC9718484.
- 674 10. Esmaili S, Owens K, Wagoner J, Polyak SJ, White JM, Schiffer JT. A unifying model to  
675 explain frequent SARS-CoV-2 rebound after nirmatrelvir treatment and limited prophylactic  
676 efficacy. *Nat Commun.* 2024;15(1):5478. Epub 20240628. doi: 10.1038/s41467-024-49458-9.  
677 PubMed PMID: 38942778; PMCID: PMC11213957.
- 678 11. Owens K, Esmaili S, Schiffer JT. Heterogeneous SARS-CoV-2 kinetics due to variable  
679 timing and intensity of immune responses. *JCI Insight.* 2024;9(9). Epub 20240404. doi:  
680 10.1172/jci.insight.176286. PubMed PMID: 38573774; PMCID: PMC11141931.
- 681 12. Edelstein GE, Boucau J, Uddin R, Marino C, Liew MY, Barry M, Choudhary MC,  
682 Gilbert RF, Reynolds Z, Li Y, Tien D, Sagar S, Vyas TD, Kawano Y, Sparks JA, Hammond SP,  
683 Wallace Z, Vyas JM, Barczak AK, ..., Siedner MJ. SARS-CoV-2 Virologic Rebound With  
684 Nirmatrelvir-Ritonavir Therapy : An Observational Study. *Ann Intern Med.* 2023;176(12):1577-  
685 85. Epub 20231114. doi: 10.7326/M23-1756. PubMed PMID: 37956428; PMCID:  
686 PMC10644265.
- 687 13. Harrington PR, Cong J, Troy SB, Rawson JMO, O'Rear JJ, Valappil TI, McGarry  
688 Connelly S, Farley J, Birnkrant D. Evaluation of SARS-CoV-2 RNA Rebound After  
689 Nirmatrelvir/Ritonavir Treatment in Randomized, Double-Blind, Placebo-Controlled Trials -  
690 United States and International Sites, 2021-2022. *MMWR Morb Mortal Wkly Rep.*  
691 2023;72(51):1365-70. Epub 20231222. doi: 10.15585/mmwr.mm7251a2. PubMed PMID:  
692 38127674; PMCID: PMC10754264.
- 693 14. Anderson AS, Caubel P, Rusnak JM, Investigators E-HT. Nirmatrelvir-Ritonavir and  
694 Viral Load Rebound in Covid-19. *N Engl J Med.* 2022;387(11):1047-9. Epub 20220907. doi:  
695 10.1056/NEJMc2205944. PubMed PMID: 36069818; PMCID: PMC9513855.
- 696 15. Perelson AS, Ribeiro RM, Phan T. An explanation for SARS-CoV-2 rebound after  
697 Paxlovid treatment. *medRxiv.* 2023:2023.05.30.23290747. doi: 10.1101/2023.05.30.23290747.
- 698 16. Hay JA, Kissler SM, Fauver JR, Mack C, Tai CG, Samant RM, Connolly S, Anderson DJ,  
699 Khullar G, MacKay M, Patel M, Kelly S, Manhertz A, Eiter I, Salgado D, Baker T, Howard B,  
700 Dudley JT, Mason CE, ..., Grad YH. Quantifying the impact of immune history and variant on  
701 SARS-CoV-2 viral kinetics and infection rebound: A retrospective cohort study. *Elife.* 2022;11.  
702 Epub 20221116. doi: 10.7554/eLife.81849. PubMed PMID: 36383192; PMCID: PMC9711520.
- 703 17. Clairon Q, Pasin C, Balelli I, Thiébaud R, Prague M. Parameter estimation in nonlinear  
704 mixed effect models based on ordinary differential equations: an optimal control approach.  
705 *Computational Statistics.* 2023. doi: 10.1007/s00180-023-01420-x.
- 706 18. Painter WP, Holman W, Bush JA, Almazedi F, Malik H, Eraut NCJE, Morin MJ,  
707 Szewczyk LJ, Painter GR. Human Safety, Tolerability, and Pharmacokinetics of Molnupiravir, a  
708 Novel Broad-Spectrum Oral Antiviral Agent with Activity Against SARS-CoV-2. *Antimicrob*  
709 *Agents Chemother.* 2021;65(5). Epub 20210301. doi: 10.1128/AAC.02428-20. PubMed PMID:  
710 33649113; PMCID: PMC8092915.
- 711 19. Shen L, Peterson S, Sedaghat AR, McMahon MA, Callender M, Zhang H, Zhou Y, Pitt E,  
712 Anderson KS, Acosta EP, Siliciano RF. Dose-response curve slope sets class-specific limits on  
713 inhibitory potential of anti-HIV drugs. *Nature Medicine.* 2008;14(7):762-6. doi:  
714 10.1038/nm1777.

- 715 20. Zhou S, Long N, Rosenke K, Jarvis MA, Feldmann H, Swanstrom R. Combined  
716 Treatment of Severe Acute Respiratory Syndrome Coronavirus 2 Reduces Molnupiravir-Induced  
717 Mutagenicity and Prevents Selection for Nirmatrelvir/Ritonavir Resistance Mutations. *J Infect*  
718 *Dis.* 2024. Epub 20240708. doi: 10.1093/infdis/jiae213. PubMed PMID: 38973065.
- 719 21. Schiffer JT, Swan DA, Corey L, Wald A. Rapid viral expansion and short drug half-life  
720 explain the incomplete effectiveness of current herpes simplex virus 2-directed antiviral agents.  
721 *Antimicrob Agents Chemother.* 2013;57(12):5820-9. Epub 2013/09/11. doi:  
722 10.1128/AAC.01114-13. PubMed PMID: 24018260; PMCID: PMC3837890.
- 723 22. Schiffer JT, Swan DA, Magaret A, Corey L, Wald A, Ossig J, Ruebsamen-Schaeff H,  
724 Stoelben S, Timmler B, Zimmermann H, Melhem MR, Van Wart SA, Rubino CM, Birkmann A.  
725 Mathematical modeling of herpes simplex virus-2 suppression with pritelivir predicts trial  
726 outcomes. *Sci Transl Med.* 2016;8(324):324ra15. Epub 2016/02/05. doi:  
727 10.1126/scitranslmed.aad6654. PubMed PMID: 26843190; PMCID: PMC4880060.
- 728 23. Backer JA, Eggink D, Andeweg SP, Veldhuijzen IK, van Maarseveen N, Vermaas K,  
729 Vlaemynck B, Schepers R, van den Hof S, Reusken CB, Wallinga J. Shorter serial intervals in  
730 SARS-CoV-2 cases with Omicron BA.1 variant compared with Delta variant, the Netherlands,  
731 13 to 26 December 2021. *Euro Surveill.* 2022;27(6). doi: 10.2807/1560-  
732 7917.ES.2022.27.6.2200042. PubMed PMID: 35144721; PMCID: PMC8832521.
- 733 24. Wu Y, Kang L, Guo Z, Liu J, Liu M, Liang W. Incubation Period of COVID-19 Caused  
734 by Unique SARS-CoV-2 Strains: A Systematic Review and Meta-analysis. *JAMA Netw Open.*  
735 2022;5(8):e2228008. Epub 20220801. doi: 10.1001/jamanetworkopen.2022.28008. PubMed  
736 PMID: 35994285; PMCID: PMC9396366.
- 737 25. Li P, Wang Y, Lavrijsen M, Lamers MM, de Vries AC, Rottier RJ, Bruno MJ,  
738 Peppelenbosch MP, Haagmans BL, Pan Q. SARS-CoV-2 Omicron variant is highly sensitive to  
739 molnupiravir, nirmatrelvir, and the combination. *Cell Res.* 2022;32(3):322-4. Epub 20220120.  
740 doi: 10.1038/s41422-022-00618-w. PubMed PMID: 35058606; PMCID: PMC8771185.
- 741 26. Yotsuyanagi H, Ohmagari N, Doi Y, Yamato M, Bac NH, Cha BK, Imamura T, Sonoyama  
742 T, Ichihashi G, Sanaki T, Tsuge Y, Uehara T, Mukae H. Efficacy and Safety of 5-Day Oral  
743 Ensitrelvir for Patients With Mild to Moderate COVID-19: The SCORPIO-SR Randomized  
744 Clinical Trial. *JAMA Netw Open.* 2024;7(2):e2354991. Epub 20240205. doi:  
745 10.1001/jamanetworkopen.2023.54991. PubMed PMID: 38335000; PMCID: PMC10858401.
- 746 27. Cruciani M, Pati I, Masiello F, Piccinini V, Pupella S, De Angelis V. SARS-CoV-2  
747 infection rebound among patients receiving antiviral agents, convalescent plasma, or no  
748 treatment: a systematic review with meta-analysis. *Blood Transfus.* 2024. Epub 20240527. doi:  
749 10.2450/BloodTransfus.764. PubMed PMID: 38814880.
- 750 28. Reeves DB, Mayer BT, deCamp AC, Huang Y, Zhang B, Carpp LN, Magaret CA, Juraska  
751 M, Gilbert PB, Montefiori DC, Bar KJ, Cardozo-Ojeda EF, Schiffer JT, Rossenkhan R, Edlefsen  
752 P, Morris L, Mkhize NN, Williamson C, Mullins JI, ..., Edupuganti S. High monoclonal  
753 neutralization titers reduced breakthrough HIV-1 viral loads in the Antibody Mediated  
754 Prevention trials. *Nat Commun.* 2023;14(1):8299. Epub 20231214. doi: 10.1038/s41467-023-  
755 43384-y. PubMed PMID: 38097552; PMCID: PMC10721814.
- 756 29. Reeves DB, Gaebler C, Oliveira TY, Peluso MJ, Schiffer JT, Cohn LB, Deeks SG,  
757 Nussenzweig MC. Impact of misclassified defective proviruses on HIV reservoir measurements.  
758 *Nat Commun.* 2023;14(1):4186. Epub 20230713. doi: 10.1038/s41467-023-39837-z. PubMed  
759 PMID: 37443365; PMCID: PMC10345136.

- 760 30. Weinreich DM, Sivapalasingam S, Norton T, Ali S, Gao H, Bhore R, Musser BJ, Soo Y,  
761 Rofail D, Im J, Perry C, Pan C, Hosain R, Mahmood A, Davis JD, Turner KC, Hooper AT,  
762 Hamilton JD, Baum A, ..., Investigators T. REGN-COV2, a Neutralizing Antibody Cocktail, in  
763 Outpatients with Covid-19. *N Engl J Med*. 2021;384(3):238-51. Epub 20201217. doi:  
764 10.1056/NEJMoa2035002. PubMed PMID: 33332778; PMCID: PMC7781102.
- 765 31. Watson JA, Kissler SM, Day NPJ, Grad YH, White NJ. Characterizing SARS-CoV-2  
766 Viral Clearance Kinetics to Improve the Design of Antiviral Pharmacometric Studies. *Antimicrob*  
767 *Agents Chemother*. 2022;66(7):e0019222. Epub 20220623. doi: 10.1128/aac.00192-22. PubMed  
768 PMID: 35736134; PMCID: PMC9295592.
- 769 32. Standing JF, Buggiotti L, Guerra-Assuncao JA, Woodall M, Ellis S, Agyeman AA, Miller  
770 C, Okechukwu M, Kirkpatrick E, Jacobs AI, Williams CA, Roy S, Martin-Bernal LM, Williams  
771 R, Smith CM, Sanderson T, Ashford FB, Emmanuel B, Afzal ZM, ..., Group PV. Randomized  
772 controlled trial of molnupiravir SARS-CoV-2 viral and antibody response in at-risk adult  
773 outpatients. *Nat Commun*. 2024;15(1):1652. Epub 20240223. doi: 10.1038/s41467-024-45641-0.  
774 PubMed PMID: 38396069; PMCID: PMC10891158.
- 775 33. Lonsdale DO, Kipper K, Baker EH, Barker CIS, Oldfield I, Philips BJ, Johnston A,  
776 Rhodes A, Sharland M, Standing JF.  $\beta$ -Lactam antimicrobial pharmacokinetics and target  
777 attainment in critically ill patients aged 1 day to 90 years: the ABDose study. *J Antimicrob*  
778 *Chemother*. 2020;75(12):3625-34. doi: 10.1093/jac/dkaa363. PubMed PMID: 32989452.
- 779 34. Singh S, Boyd S, Schilling WHK, Watson JA, Mukaka M, White NJ. The relationship  
780 between viral clearance rates and disease progression in early symptomatic COVID-19: a  
781 systematic review and meta-regression analysis. *J Antimicrob Chemother*. 2024. Epub 20240222.  
782 doi: 10.1093/jac/dkae045. PubMed PMID: 38385479.
- 783 35. Prague M, Lavielle M. SAMBA: A novel method for fast automatic model building in  
784 nonlinear mixed-effects models. *CPT Pharmacometrics Syst Pharmacol*. 2022;11(2):161-72.  
785 Epub 20220201. doi: 10.1002/psp4.12742. PubMed PMID: 35104058; PMCID: PMC8846636.
- 786 36. Bing A, Hu Y, Prague M, Hill AL, Li JZ, Bosch RJ, De Gruttola V, Wang R. Comparison  
787 of empirical and dynamic models for HIV viral load rebound after treatment interruption. *Stat*  
788 *Commun Infect Dis*. 2020;12(Suppl 1). Epub 20200821. doi: 10.1515/scid-2019-0021. PubMed  
789 PMID: 34158910; PMCID: PMC8216669.
- 790 37. Chan PL, Jacqmin P, Lavielle M, McFadyen L, Weatherley B. The use of the SAEM  
791 algorithm in MONOLIX software for estimation of population pharmacokinetic-  
792 pharmacodynamic-viral dynamics parameters of maraviroc in asymptomatic HIV subjects. *J*  
793 *Pharmacokinet Pharmacodyn*. 2011;38(1):41-61. Epub 2010/11/19. doi: 10.1007/s10928-010-  
794 9175-z. PubMed PMID: 21088872; PMCID: PMC3020311.
- 795 38. Ke R, Zitzmann C, Ho DD, Ribeiro RM, Perelson AS. In vivo kinetics of SARS-CoV-2  
796 infection and its relationship with a person's infectiousness. *Proc Natl Acad Sci U S A*.  
797 2021;118(49). doi: 10.1073/pnas.2111477118. PubMed PMID: 34857628.
- 798 39. Galmiche S, Cortier T, Charmet T, Schaeffer L, Chény O, von Platen C, Lévy A, Martin  
799 S, Omar F, David C, Mailles A, Carrat F, Cauchemez S, Fontanet A. SARS-CoV-2 incubation  
800 period across variants of concern, individual factors, and circumstances of infection in France: a  
801 case series analysis from the ComCor study. *Lancet Microbe*. 2023;4(6):e409-e17. Epub  
802 20230418. doi: 10.1016/S2666-5247(23)00005-8. PubMed PMID: 37084751; PMCID:  
803 PMC10112864.
